# Supplementary material
Source: publisher figshare collection journal article supplement (https://tandf.figshare.com/ndownloader/files/12804992)
Supplement: Supplementary file 1 [file 12804992]

**Supplemental Online Material**

**Figure S1.** Comparison between the neutron spectra of HEU-Bi test zone in KUCA and LBE-cooled core in JAEA ADS model

Table S1. Atomic density of polyethylene moderator (p).

| Isotope | Atomic density [×1024/cm3] | |
| --- | --- | --- |
|  | 1/8” thick plate | 10.0” long rod |
| 1H | 7.77938E-02 | 7.97990E-02 |
| 12C | 3.95860E-02 | 4.08960E-02 |

Table S2. Atomic density of polyethylene reflector (PE).

| Isotope | Atomic density [×1024/cm3] | | |
| --- | --- | --- | --- |
|  | 1/2” thick plate | 1/4” thick plate | 1/8” thick plate |
| 1H | 8.06560E-02 | 8.08711E-02 | 8.02167E-02 |
| 12C | 4.03280E-02 | 4.04356E-02 | 4.01084E-02 |

Table S3. Atomic density of aluminum sheath for the core element.

| Isotope | Atomic density [×1024/cm3] |
| --- | --- |
| 27Al | 6.00385E-02 |

Table S4. Atomic density of 1/16” thick HEU fuel plate (U-Al alloy).

| Isotope | Atomic density [×1024/cm3] |
| --- | --- |
| 234U | 1.13659E-05 |
| 235U | 1.50682E-03 |
| 236U | 4.82971E-06 |
| 238U | 9.25879E-05 |
| 27Al | 5.56436E-02 |

Table S5. Atomic density of Al plate, Bi plate and Gr reflector (12C).

| Isotope | Atomic density [×1024/cm3] |
| --- | --- |
| 27Al | 5.97721E-02 |
| 209Bi | 2.73621E-02 |
| 12C | 8.64182E-02 |

Table S6. Atomic density of control and safety rods.

| Isotope | Atomic density [×1024/cm3] |
| --- | --- |
| 10B | 3.87448E-03 |
| 11B | 1.68447E-02 |
| 16O | 3.10787E-02 |
